# Supplementary material
Source: PubMed Central journal article supplement (PMC514949)
Supplement: 7600289s2.pdf [file 7600289s2.pdf]

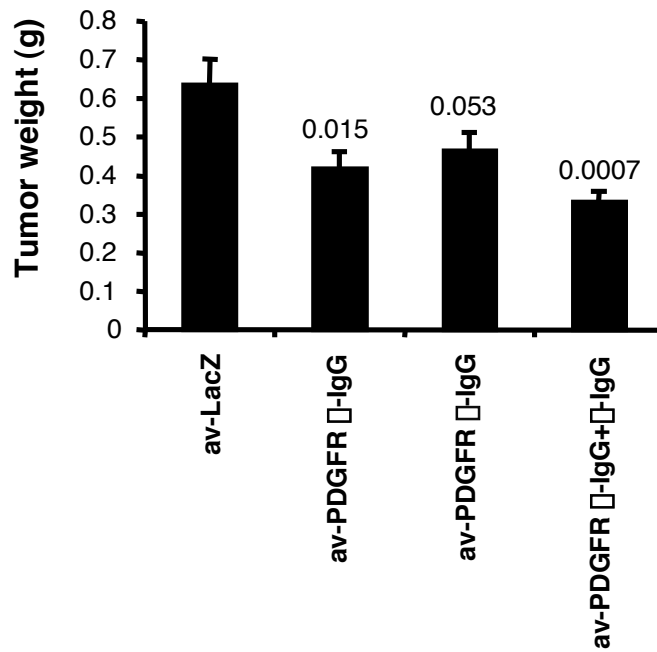

**Supplementary Fig.2.** Inhibition of tumor growth by combining soluble PDGFR ̢-IgG and PDGFR ̢-IgG.

G5 tumor-bearing animals were treated with intratumoral injection of Av-LacZ, Av-PDGFR ̢-IgG, Av-PDGFR ̢-IgG or Av-PDGFR ̢-IgG and Av-PDGFR ̢-IgG combined, each at  $5 \times 10^8$  pfu, once weekly. Tumor weight was determined three weeks post tumor cell inoculation.
