# Supplementary material
Source: PubMed Central journal article supplement (PMC514949)
Supplement: 7600289s3.pdf [file 7600289s3.pdf]

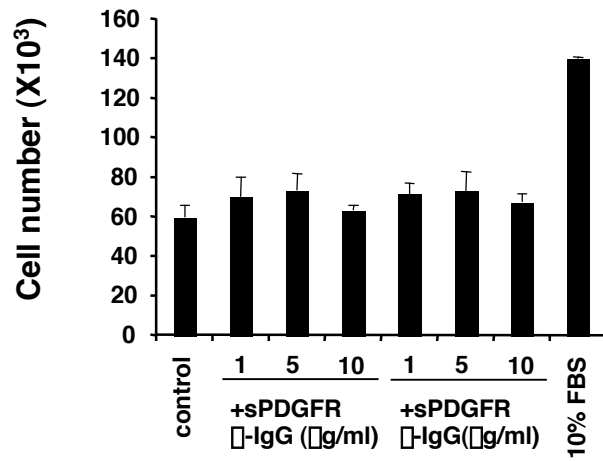

**Supplementary Fig.3.** Soluble PDGFR ̑-IgG and PDGFR ̑-IgG had no effect on tumor cell proliferation.

G5 cells were cultured in the presence of the indicated concentrations of soluble PDGFR ̑-IgG or PDGFR ̑-IgG proteins for five days before cells were counted.
