# Supplementary material
Source: PubMed Central journal article supplement (PMC514949)
Supplement: 7600289s4.pdf [file 7600289s4.pdf]

## Supplementary Material

The sequences of primers and probes for real-time quantitative RT-PCR analysis are as follows: GAPDH forward 5'-CAGTGGCAATGTGGAGATTGT-3', reverse 5'-AATTTGCCGTGAGTGGAGTC-3', GAPDH probe FAM-CCATCAACGACCCCTTCATTGACCTC-TAMRA; VEGF forward 5'-TGTACCTCCACCATGCCAAGT-3', reverse 5'-TGGAAGATGTCCACCAGGGT-3', VEGF probe FAM-CCAGCGAAGCTACTGCTGCCGTCCAATT-TAMRA.

The ISH probe templates were PCR amplified using the primers described below. VEGF exon3 probe: length 193 nucleotides, corresponding to 202-394 of NM\_009505, upper primer 5'-TGATCAAGTTCATGGACGTCTACC-3', lower primer 5'-ATGGTGATGTTGCTCTCTGACG-3'. PDGF-A probe: length 571 nucleotides, corresponding to 192-762 of NM\_008808, upper primer 5'-TGGGCTTGCTGCTGCTGC-TCCT-3', lower primer 5'-CTGTCTCCTCCTCCCGATGGTCT-3'. PDGF-B probe: length 653 nucleotides, corresponding to 1082-1734 of NM\_011057, upper primer 5'-CACTCCATCCGCTCCTTTGA-3', lower primer 5'-AAATAACCCTGCCCACT-CTTG-3'. PDGF-C probe: length 785 nucleotides, corresponding to 1033-1817 of NM\_019971, upper primer 5'-CGGCCTCCTCCTGCTGAC-3', lower primer 5'-TCCTCTTTAGCTCTTCCCGTATG-3'. PDGFR  $\alpha$  probe: length 799 nucleotides, corresponding to 268-1066 of NM\_011058, upper primer 5'-TTACCCTCTATCCTCCCAAACGA-3', lower primer 5'-GGGCAGCACATTCATACTCTCC-3'. PDGFR  $\beta$  probe: length 742 nucleotides, corresponding to 574-1315 of NM\_008809, upper primer

5'-ATTCCGTGCCGAGTGACAGACCC-3', lower primer 5'-AGTAGCCCGCTTCTG-  
ACACCTT-3'.
